# Supplementary material for: Sperm Motility, Oxidative Status, and Mitochondrial Activity: Exploring Correlation in Different Species
Source: MDPI journal article supplement (doi:10.3390/antiox10071131), 2021-07-16
Supplement: s1 [file s1]

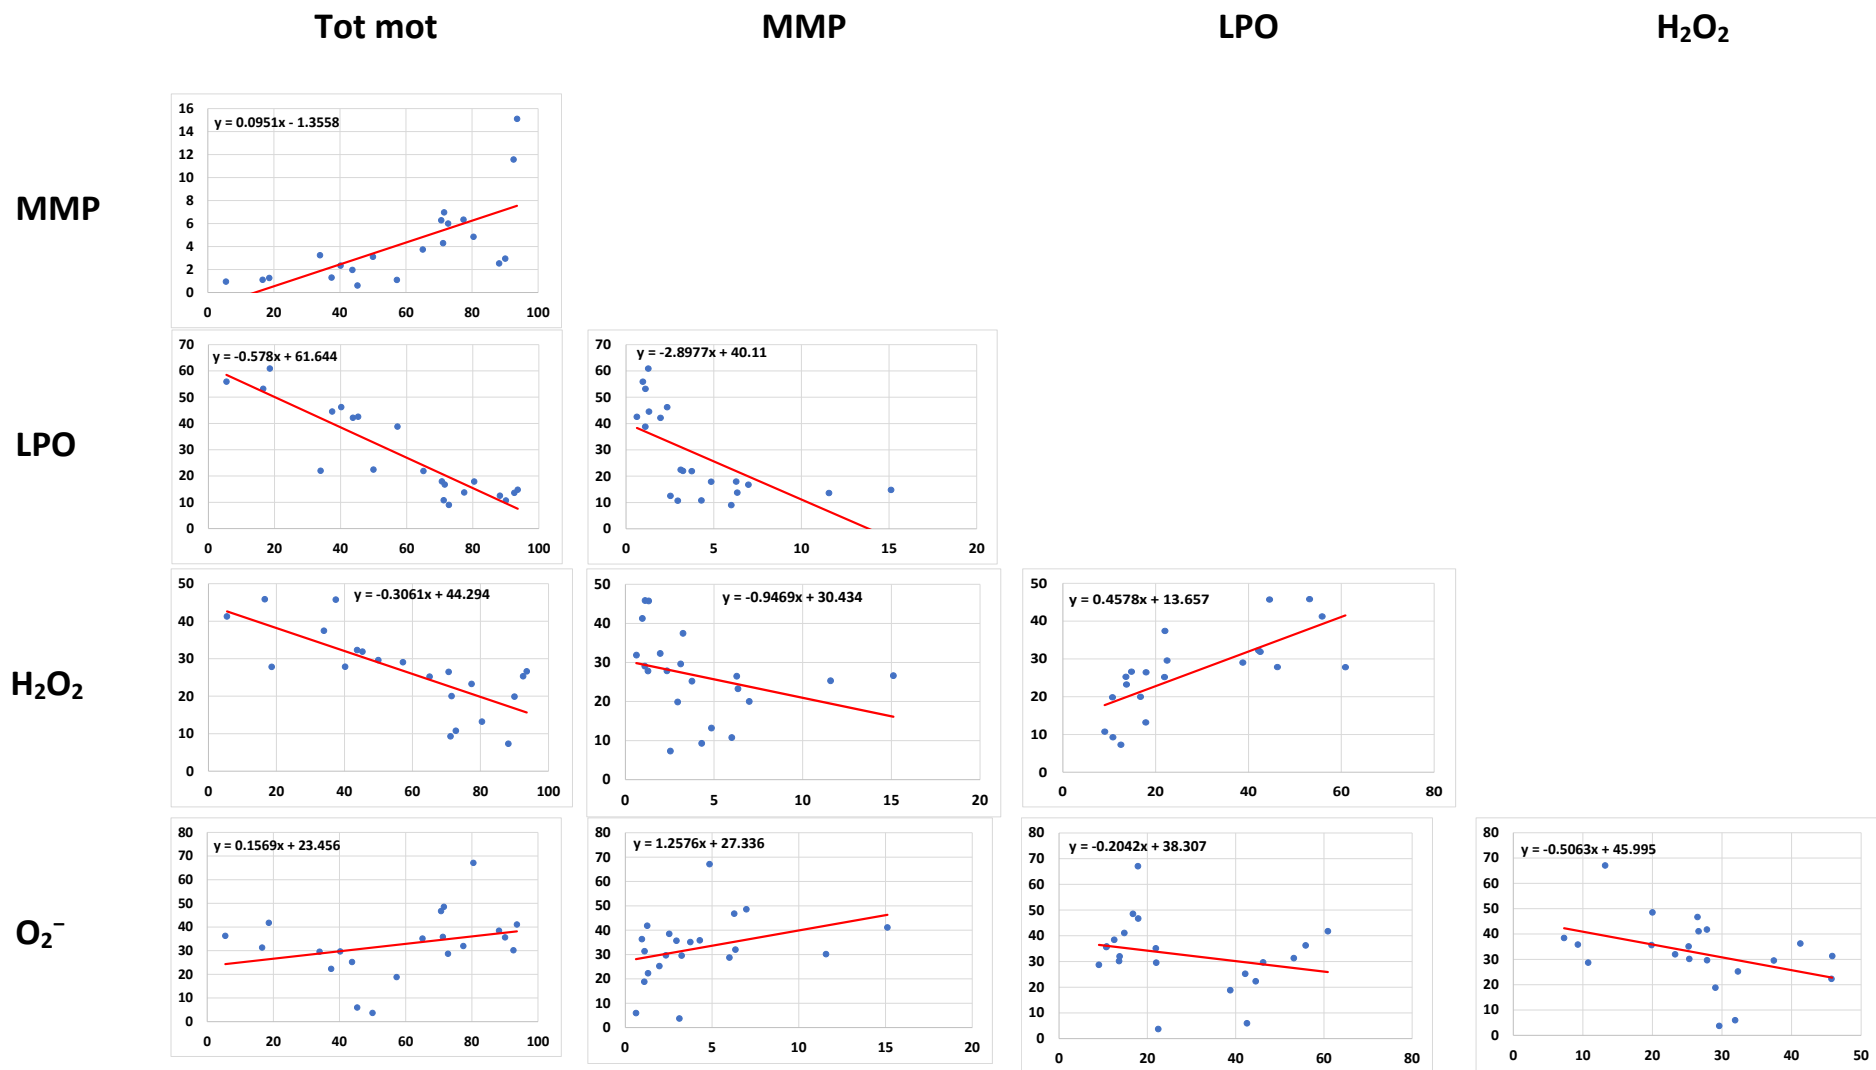

**Figure S1.** Correlation plots between Total motility (Tot Mot), mitochondrial membrane potential (MMP), Lipid peroxidation (LPO), H<sub>2</sub>O<sub>2</sub> and O<sub>2</sub><sup>-</sup> contents in *Bos taurus* spermatozoa.

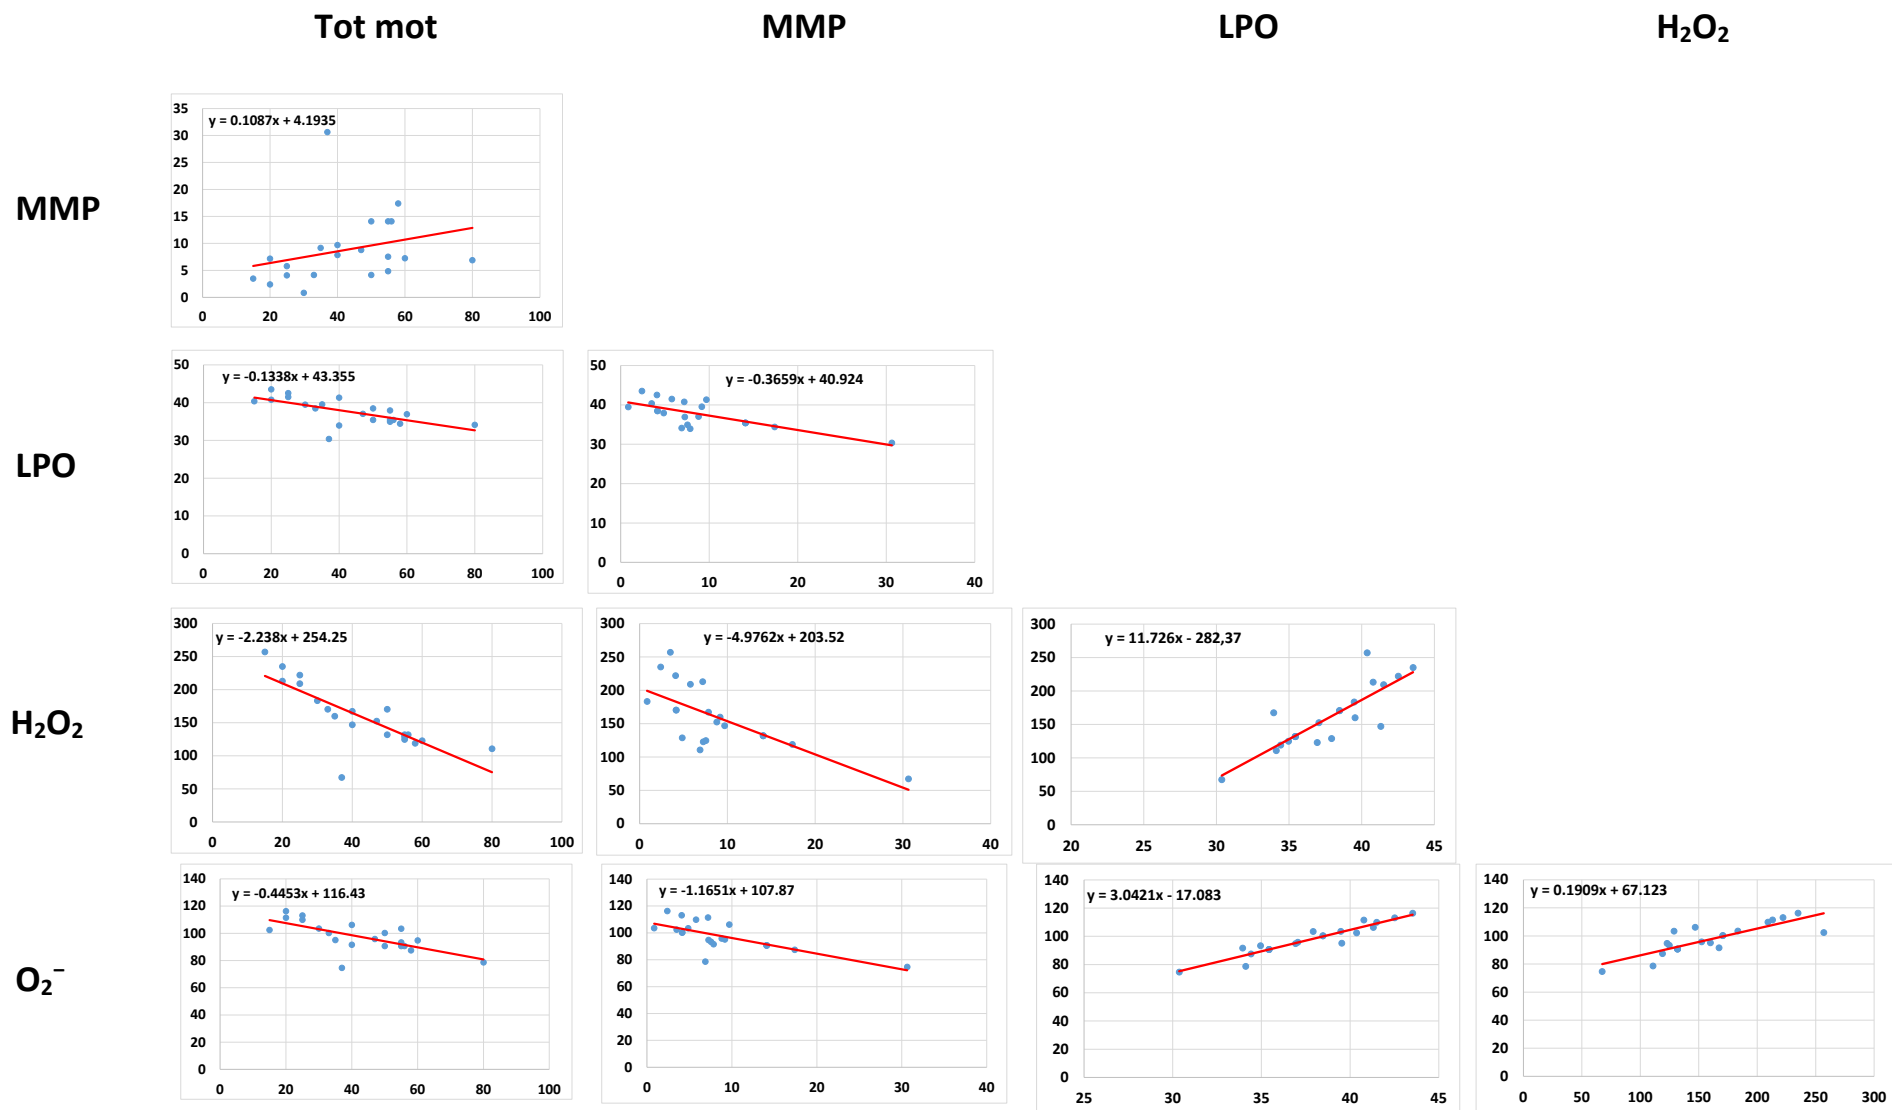

**Figure S2.** Correlation plots between Total motility (Tot Mot), mitochondrial membrane potential (MMP), Lipid peroxidation (LPO), H<sub>2</sub>O<sub>2</sub> and O<sub>2</sub><sup>-</sup> contents in *Ciona Robusta* spermatozoa.

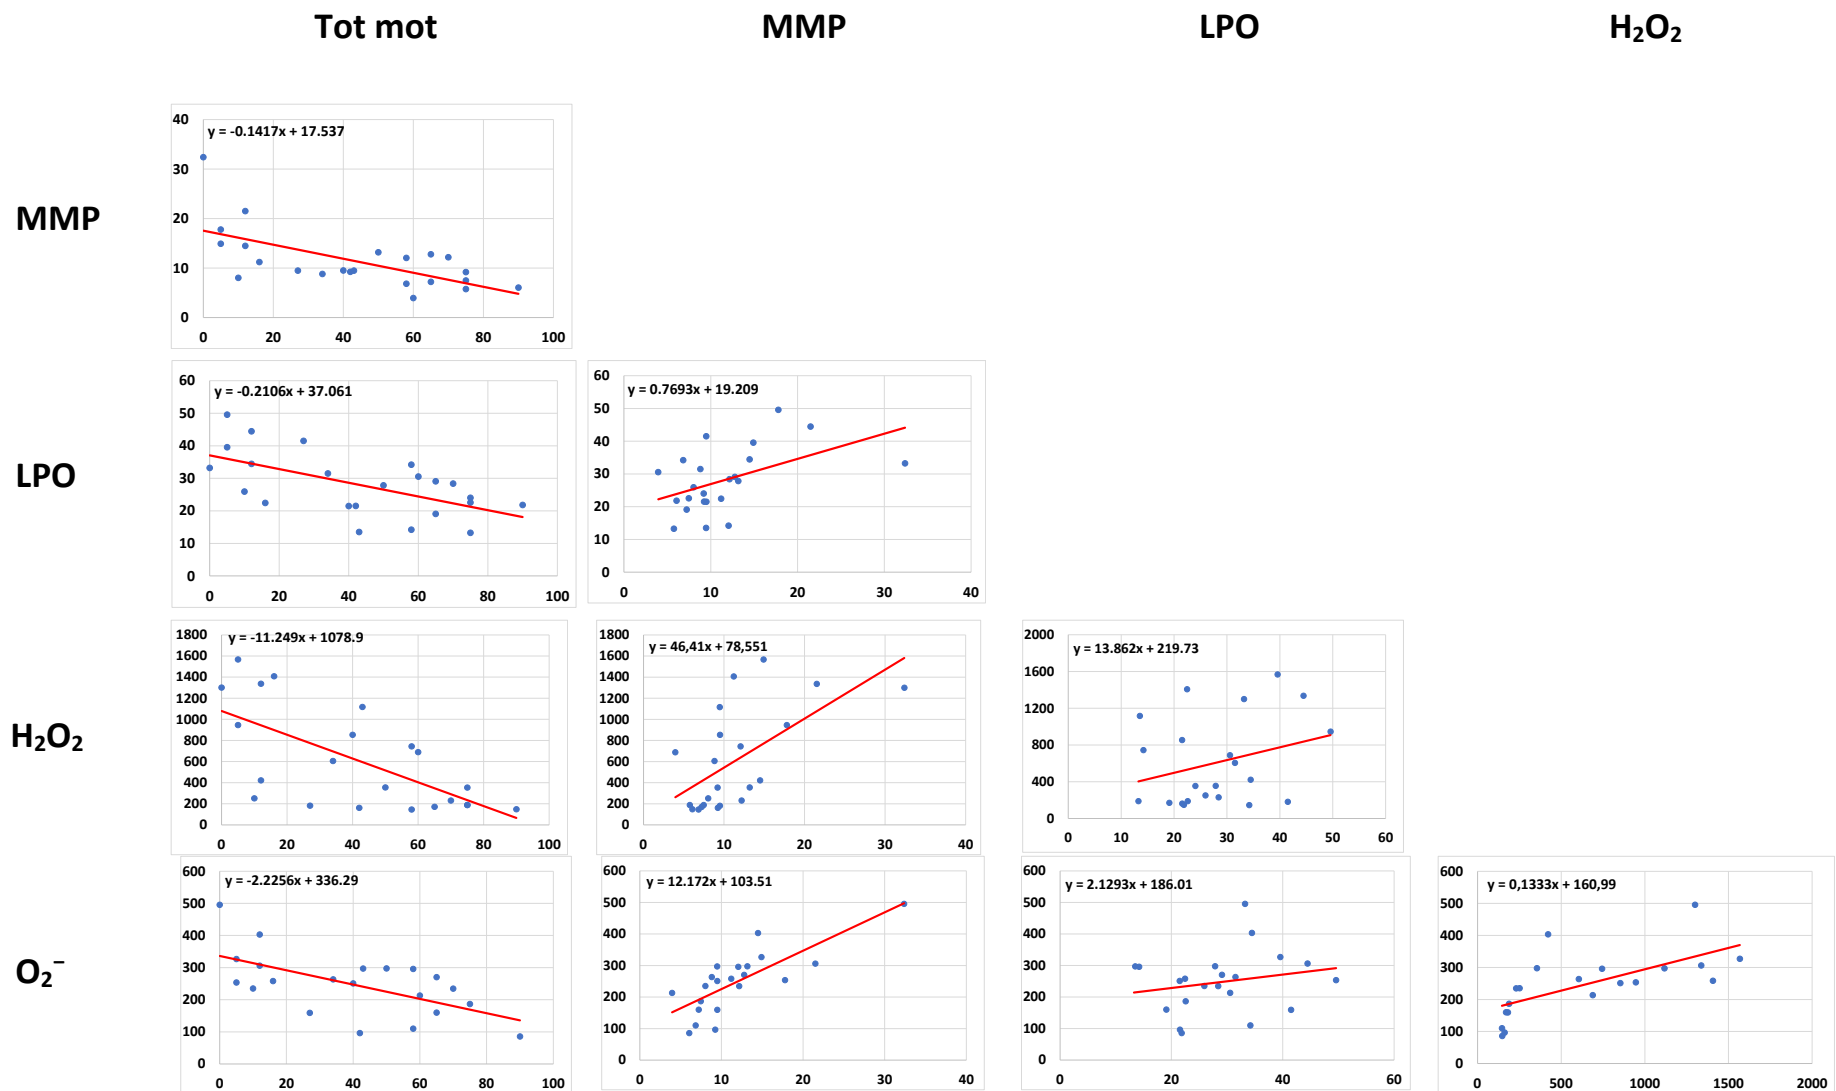

**Figure S3.** Correlation plots between Total motility (Tot Mot), mitochondrial membrane potential (MMP), Lipid peroxidation (LPO), H<sub>2</sub>O<sub>2</sub> and O<sub>2</sub><sup>-</sup> contents in *Mytilus galloprovincialis* spermatozoa.
